# Supplementary material for: B7-CD28 gene family expression is associated with prognostic and immunological characteristics of diffuse large B-cell lymphoma
Source: publisher site journal article supplement (doi:10.18632/aging.102025), 2019-06-13
Supplement: Supplementary file [file aging-v11i12-102025-supplementary-material-SD1.pdf]

SUPPLEMENTARY FIGURES

A

Riskscore related genes in GSE31312

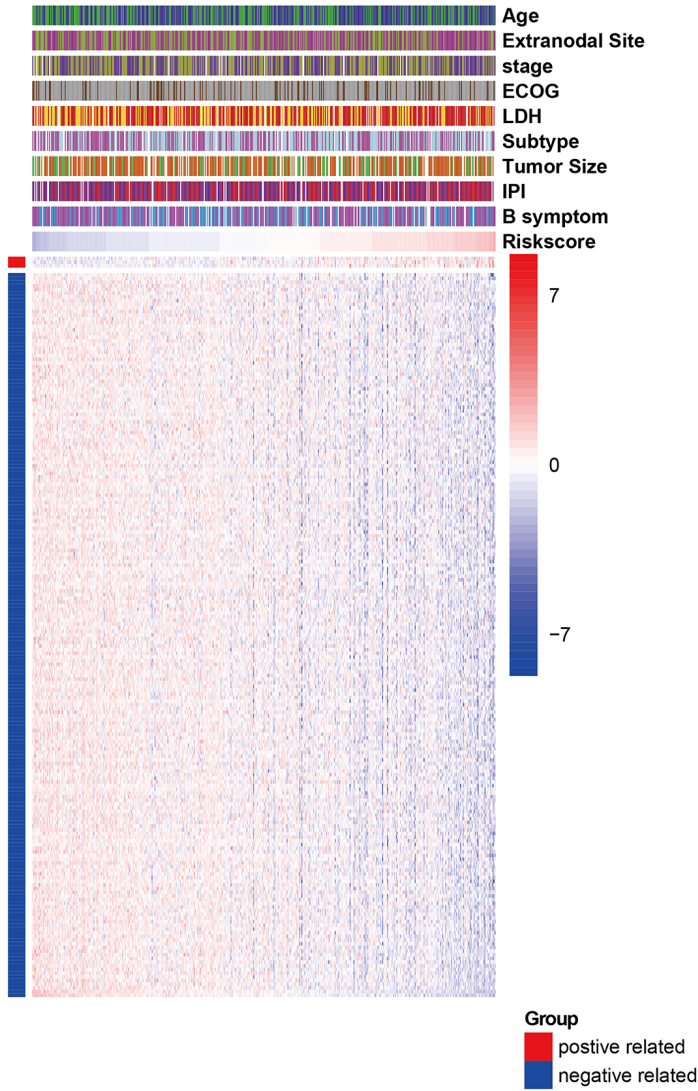

B

Riskscore related genes in GS117556

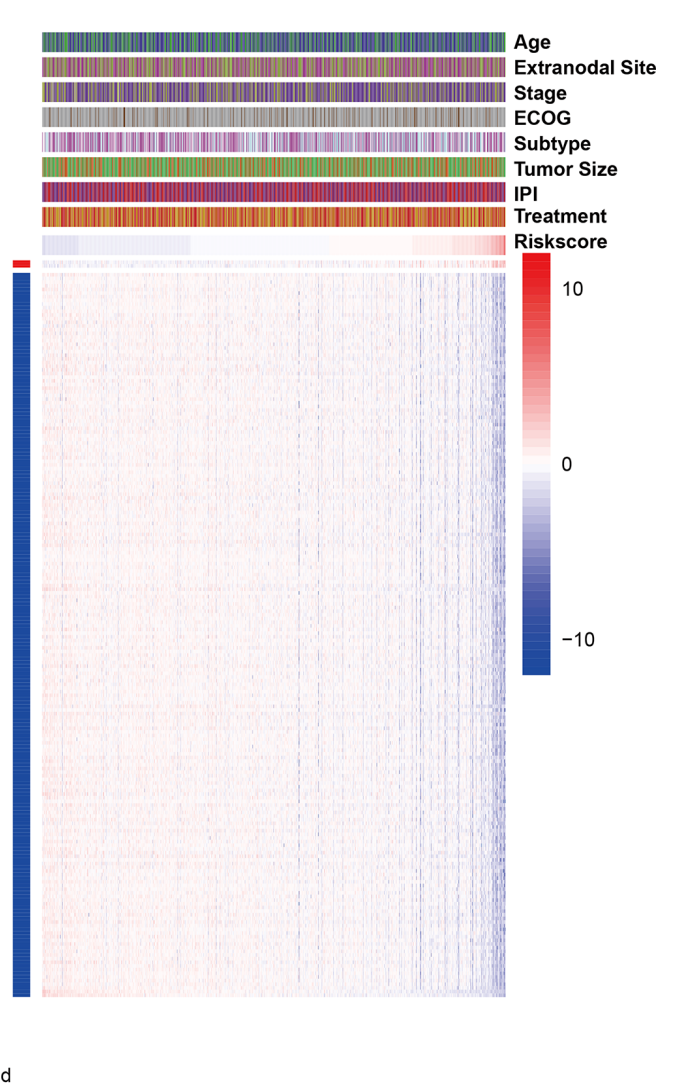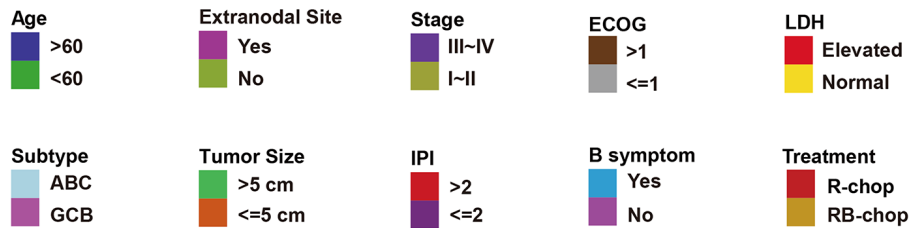

**Supplementary Figure 1. Risk score-related genes and clinical characteristics in GSE31312 (A) and GSE117556 (B) patients.** ECOG: Eastern Cooperative Oncology Group score, IPI: International Prognostic Index, ABC: activated B-cell-like, GCB: germinal center B-cell-like, R-CHOP: cyclophosphamide, doxorubicin, vincristine, and prednisone plus rituximab, BR-CHOP: cyclophosphamide, doxorubicin, vincristine, and prednisone plus rituximab and bortezomib.

### Immune checkpoints expression distribution in GSE31312

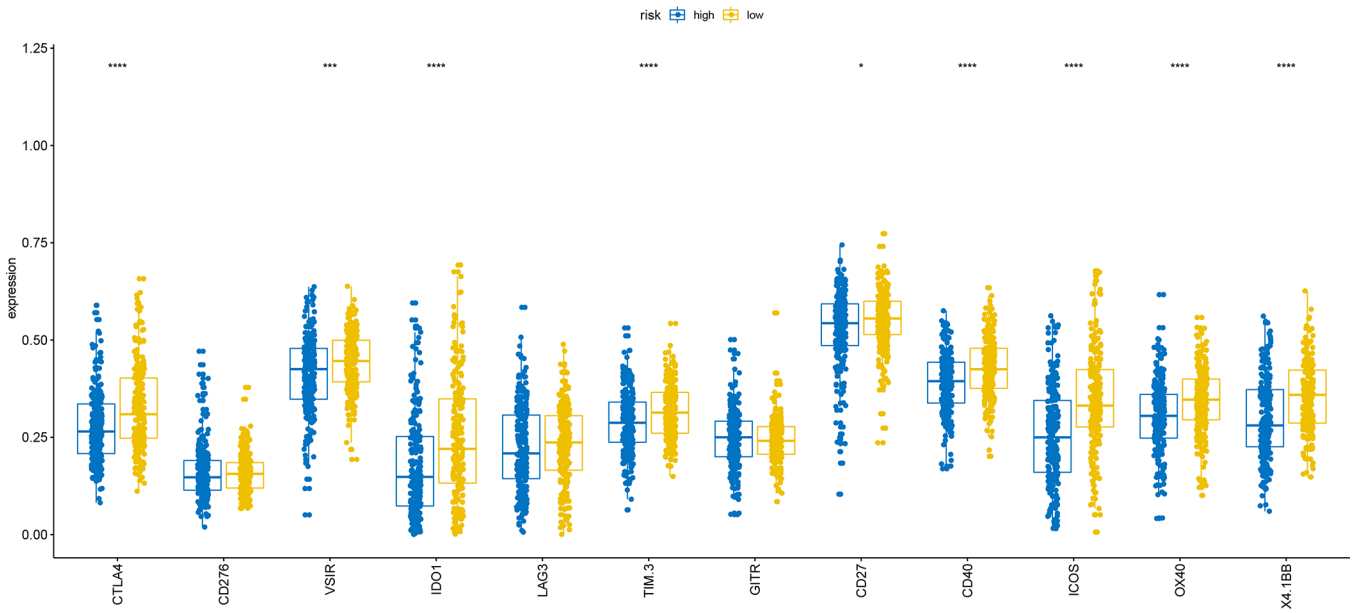

Supplementary Figure 2. Distribution of immune checkpoint gene expression in GSE31312 patients.

### Immune checkpoints expression distribution in GSE117556

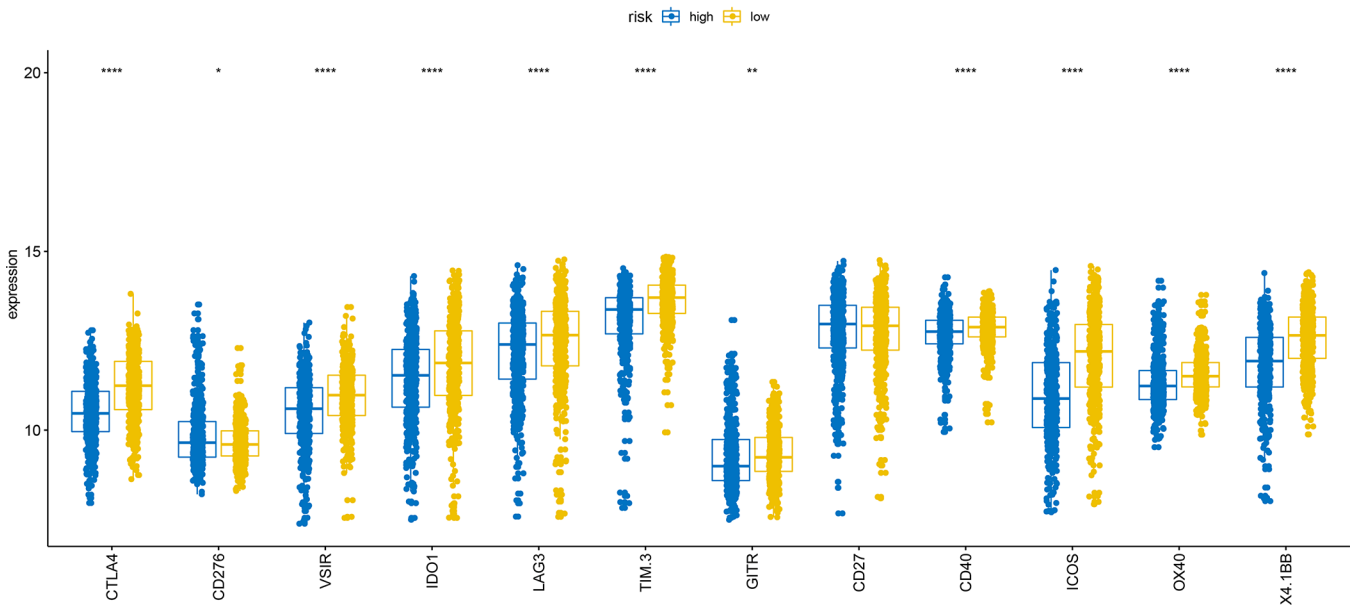

Supplementary Figure 3. Distribution of immune checkpoint gene expression in GSE117556 patients.

**A**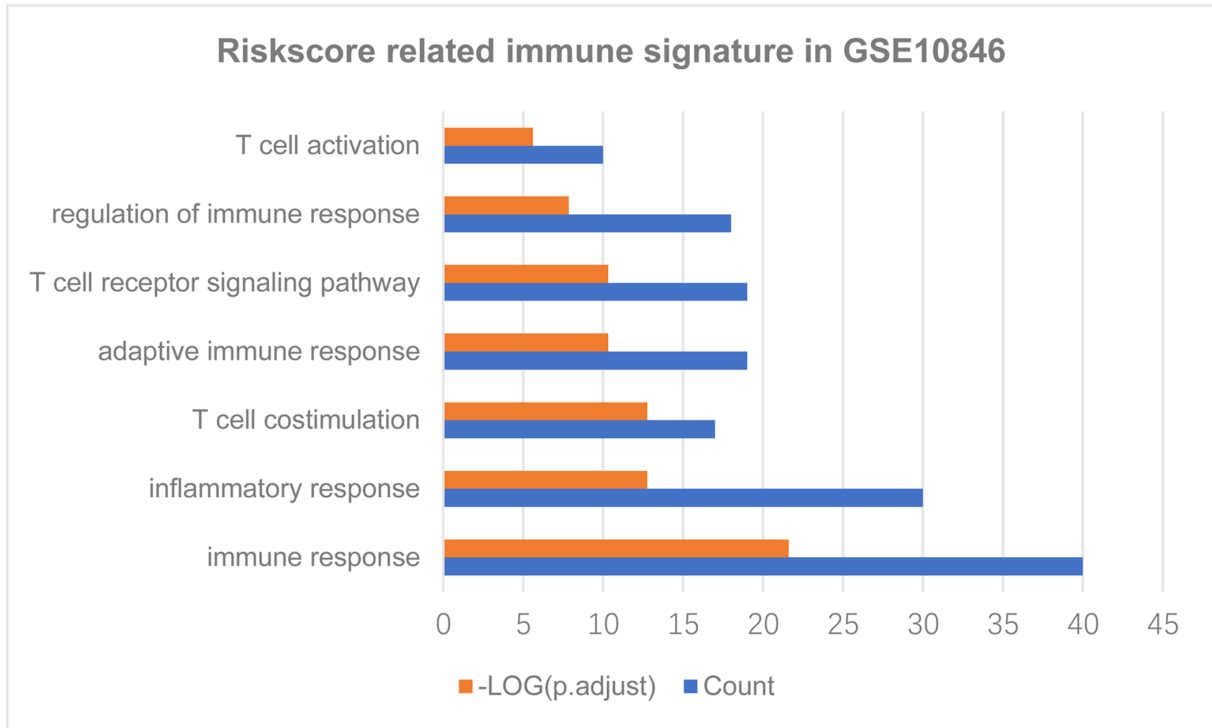**B**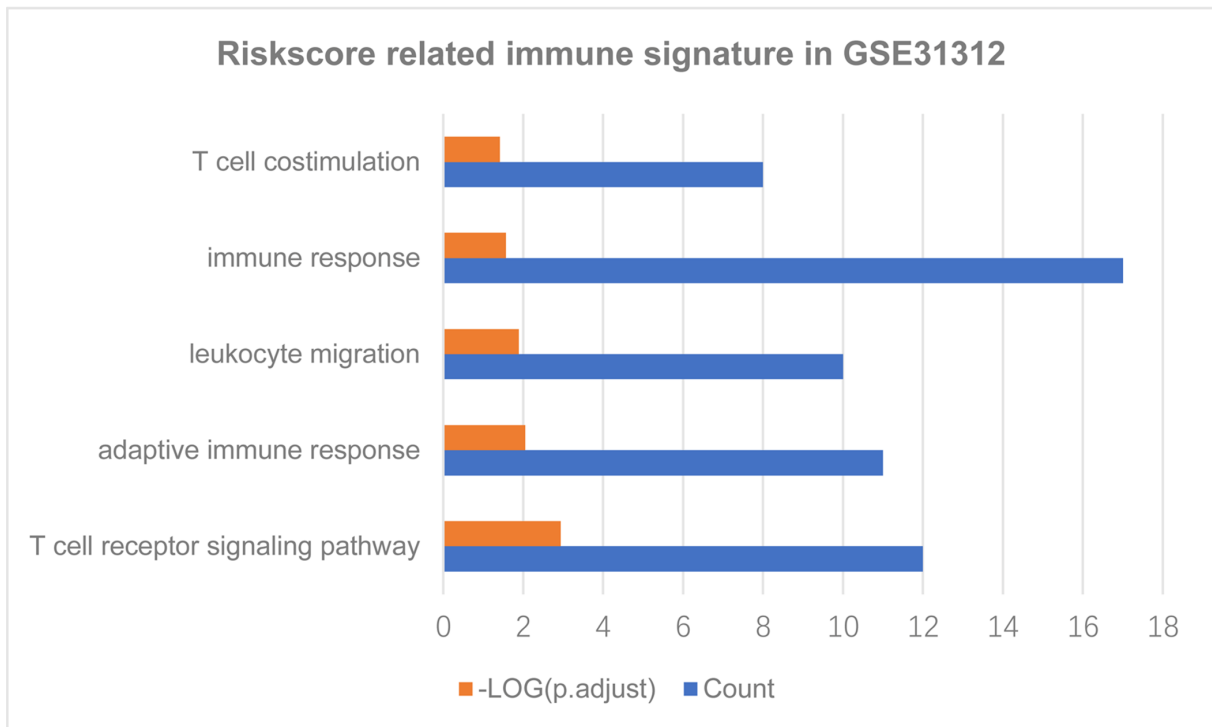

**Supplementary Figure 4. Risk score-related immune expression patterns in GSE10846 (A) and GSE31312 (B) patients.**

**A**

**Riskscore related T cell specific immunity in GSE10846**

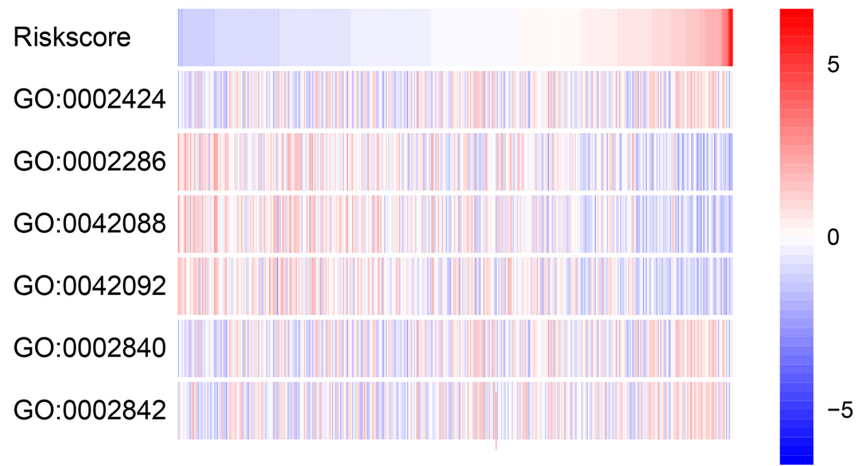

**B**

**Riskscore related T cell specific immunity in GSE31312**

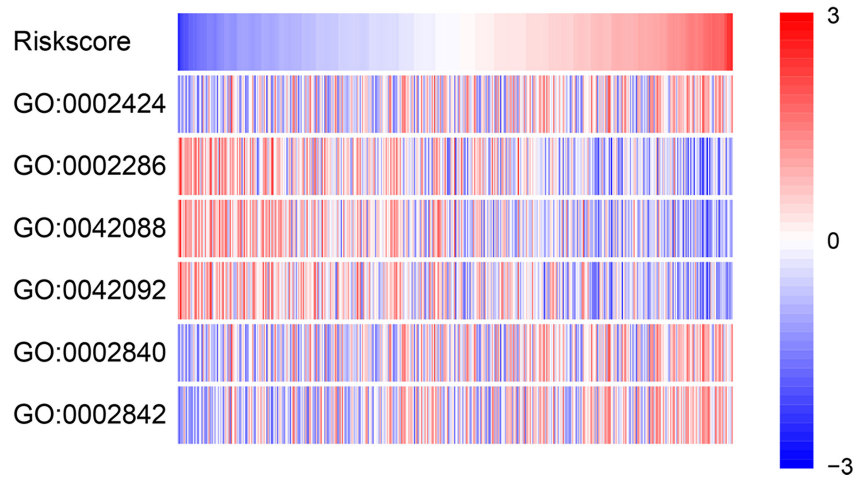

**Supplementary Figure 5. Risk score-related T cell-specific immunity in GSE10846 (A) and GSE31312 (B) patients.**
